# Supplementary material
Source: PubMed Central journal article supplement (PMC7587132)
Supplement: mmc1.pdf [file mmc1.pdf]

Total 113 patients were screened

61 were excluded:

- 18 were suspected cases
- 20 did not accept informed consents
- 23 had enrolled in other clinical trials

52 underwent enrollment :

- 0 in mild ill
- 21 in general ill
- 17 in severe ill
- 14 in critical ill

Blood sample collection and data analysis:

- Blood samples collected on D1/D3/Dx/Dend (if clinically available )
- Cut-off time for data analysis : over 80% patients reached clinical end-point

Managements and follow-up after discharge:

- All patients received the isolation for 14 days and took throat swab tests according to guideline.
- The patients with positive blood tests on Dend and their close contacts were asked for additional clinical visits, blood viral load tests and swabs tests. If COVID-19 related clinical manifestations occurred, blood counts, serological tests and CT scans should be needed.
